## **A new family of Type VI secretion system-delivered effector proteins displays ion-selective pore-forming activity**

Giuseppina Mariano<sup>1</sup>, Katharina Trunk<sup>1</sup>, David J. Williams<sup>1</sup>, Laura Monlezun<sup>1</sup>, Henrik Strahl<sup>2</sup>,  
Samantha J. Pitt<sup>3</sup> and Sarah J. Coulthurst<sup>\*1</sup>.

<sup>1</sup>Division of Molecular Microbiology, School of Life Sciences, University of Dundee, Dow St, Dundee, DD1 5EH, UK; <sup>2</sup>Centre for Bacterial Cell Biology, Newcastle University, Richardson Road, Newcastle-upon-Tyne, NE2 4AX, UK; <sup>3</sup>School of Medicine, University of St Andrews, North Haugh, St Andrews KY16 9TF, UK.

\*Correspondence may be addressed to Sarah Coulthurst ([s.j.coulthurst@dundee.ac.uk](mailto:s.j.coulthurst@dundee.ac.uk))

1 **Abstract**

2 Type VI secretion systems (T6SSs) are nanomachines widely used by bacteria to compete with rivals.  
3 T6SSs deliver multiple toxic effector proteins directly into neighbouring cells and play key roles in  
4 shaping diverse polymicrobial communities. A number of families of T6SS-dependent anti-bacterial  
5 effectors have been characterised, however the mode of action of others remains unknown. Here we  
6 report that Ssp6, an anti-bacterial effector delivered by the *Serratia marcescens* T6SS, is an ion-  
7 selective pore-forming toxin. *In vivo*, Ssp6 inhibits growth by causing depolarisation of the inner  
8 membrane of intoxicated cells and also leads to increased outer membrane permeability, whilst  
9 reconstruction of Ssp6 activity *in vitro* demonstrated that it forms cation-selective pores. A survey of  
10 bacterial genomes revealed that Ssp6-like effectors are widespread in Enterobacteriaceae and often  
11 linked with T6SS genes. We conclude that Ssp6 represents a new family of T6SS-delivered anti-  
12 bacterial effectors, further diversifying the portfolio of weapons available for deployment during inter-  
13 bacterial conflict.

14 Bacteria have developed a variety of strategies to overcome their competitors and access limited  
15 resources, enabling them to survive and proliferate in multitude of polymicrobial environments. In some  
16 cases, these strategies involve actively killing or inhibiting the growth of rival bacteria. One mechanism  
17 widely used by Gram-negative bacteria for this kind of active competition is the Type VI secretion  
18 system (T6SS). The T6SS is a contact-dependent nanomachine which delivers toxic effector proteins  
19 directly into neighbouring cells. Bacteria most commonly use the T6SS to attack competitor bacteria,  
20 but this versatile weapon can also be used for manipulating host cells, killing fungal competitors or  
21 scavenging metals<sup>1</sup>. The T6SS is a mechanical puncturing device related to several contractile injection  
22 systems including bacteriophages<sup>2</sup>. According to the current model<sup>1, 3-5</sup>, contraction of an extended  
23 cytoplasmic sheath anchored in a trans-membrane basal complex propels a cell-puncturing structure,  
24 comprising a tube of Hcp hexamers tipped by a VgrG-PAAR spike, out of the secreting cell and towards  
25 a target cell. The Hcp-VgrG-PAAR structure is decorated by effector proteins which can interact  
26 covalently or non-covalently with one of these components. The rapid and powerful contraction events  
27 lead to the breach of a target cell by the expelled puncturing structure, followed by release of effectors  
28 inside the target cell.

29 A number of anti-bacterial effectors delivered by the T6SS have been described. These include large  
30 and diverse families of peptidoglycan hydrolases, phospholipases, nucleases and NAD(P)<sup>+</sup>-  
31 glycohydrolases<sup>1, 6-11</sup>. Singly or in combination, they provide effective killing or inhibition of targeted  
32 bacterial cells. In order to prevent self-intoxication or intoxication by genetically-identical neighbouring  
33 cells, T6SS-deploying bacteria possess a specific immunity protein for each anti-bacterial effector.  
34 Immunity proteins are encoded adjacent to their cognate effector, reside in the cellular compartment in  
35 which the effector exerts its action, and typically work by binding to the effector and occluding its active  
36 site<sup>1</sup>. Whilst many anti-bacterial T6SS effectors now have demonstrated or predictable functions, there  
37 remain many others whose function is unknown or not yet fully characterised. Intoxication by two  
38 unrelated effectors, Tse4 in *Pseudomonas aeruginosa* and VasX in *Vibrio cholerae*, led to loss of  
39 membrane potential and these effectors were proposed to be pore-forming toxins<sup>12, 13</sup>, however such a  
40 mechanism has not yet been demonstrated or characterised *in vitro* for a T6SS effector.

41 The opportunistic pathogen, *Serratia marcescens*, has a potent anti-bacterial T6SS, which secretes at  
42 least eight anti-bacterial effector proteins in addition to two anti-fungal effectors<sup>14-16</sup>. Several of these  
43 anti-bacterial effectors are not related to previously-characterised effectors and have mechanisms that  
44 cannot be readily predicted, therefore they likely represent novel anti-bacterial toxins. Here, we report  
45 the detailed characterisation of one of these new effectors, Ssp6. We reveal that Ssp6 acts by causing  
46 depolarisation of the target cell cytoplasmic membrane *in vivo* and provide a mechanistic explanation  
47 for this observation by demonstrating the ability of Ssp6 to form cation-selective pores *in vitro*.  
48 Homologues of Ssp6 can be found in many species of Enterobacteriaceae, hence Ssp6 defines a new  
49 family of T6SS-delivered, ion-selective pore-forming toxins.

50

## 51 **Results**

### 52 **Ssp6 is a T6SS-delivered anti-bacterial effector protein and Sip6 is its cognate, membrane-located** 53 **immunity protein**

54 Ssp6 (SMDB11\_4673) was identified as a small effector secreted by the T6SS of *S. marcescens* Db10  
55 in previous studies using a mass spectrometry approach. However, its mode of action, which is not  
56 readily predictable from sequence-based or structural prediction methods, was not determined<sup>14,15</sup>. Ssp6  
57 is encoded outside the main T6SS gene cluster and is not linked with any T6SS genes (Fig. 1a). Using  
58 a strain of *S. marcescens* Db10 carrying Ssp6 fused with a C-terminal HA tag encoded at the normal  
59 chromosomal location (Ssp6-HA), we confirmed that Ssp6 is secreted in a T6SS-dependent manner,  
60 similar to the expelled component Hcp (Fig. 1b). No candidate immunity protein for Ssp6 is annotated  
61 in the published genome sequence of *S. marcescens* Db11 (a streptomycin-resistant derivative of  
62 Db10)<sup>17</sup>. We identified a 204 bp open reading frame (*SMDB11\_4672A*) immediately downstream and  
63 overlapping by four nucleotides with *ssp6*. This genetic context strongly suggested that the encoded  
64 protein, named Sip6, represented the cognate immunity protein (Fig. 1a). To investigate the ability of  
65 Sip6 to inhibit Ssp6-mediated toxicity, we tested the susceptibility of a mutant lacking Sip6 to T6SS-  
66 and Ssp6-dependent inhibition by the wild type strain. The  $\Delta$ *ssp6* $\Delta$ *sip6* ‘target’ strain was indeed  
67 sensitive to T6SS-delivered Ssp6 activity, showing a loss in recovery when co-cultured with a wild type  
68 ‘attacker’ compared with attacker strains lacking an active T6SS ( $\Delta$ *tssE*) or Ssp6 (Fig. 1c). The inability  
69 of the  $\Delta$ *ssp6* mutant to cause intoxication could be complemented by expression of Ssp6 *in trans*, while  
70 expression of Sip6 restored the resistance of the  $\Delta$ *ssp6* $\Delta$ *sip6* mutant against the wild type  
71 (Supplementary Fig. 1a). To confirm that Ssp6 and Sip6 are directly responsible for toxicity and  
72 immunity, respectively, Ssp6 with or without Sip6 was artificially expressed in *E. coli*. Ssp6 was either  
73 directed to the periplasm of *E. coli* through fusion with an N-terminal OmpA signal peptide (sp-Ssp6),  
74 or allowed to remain in the cytoplasm. Whilst Ssp6 was only mildly toxic when present in the  
75 cytoplasm, its presence in the periplasm caused pronounced inhibition of growth (Fig. 1d). This toxicity  
76 was alleviated upon co-expression of Sip6, thus confirming the identification of Sip6 as the cognate  
77 immunity protein of Ssp6.

78 In order to effectively prevent toxicity, T6SS immunity proteins are localised according to the cellular  
79 compartment in which the corresponding effector carries out its activity. Sip6 is predicted to contain  
80 two transmembrane helices (Fig. 1a), suggesting that Sip6 is localised in the membrane and that Ssp6  
81 might intoxicate target cells by targeting their membranes. A strain of *S. marcescens* Db10 carrying a  
82 Sip6-FLAG fusion protein encoded at the normal chromosomal location was subjected to subcellular  
83 fractionation, which confirmed the presence of Sip6 in the membrane fraction (Fig. 1e). Interestingly,  
84 separation of the inner and outer membrane fractions revealed that Sip6-FLAG is localised in the outer

85 membrane fraction. This was somewhat unexpected, since transmembrane helices are typically found  
86 in proteins that are localised in the inner membrane<sup>18</sup>, but is not unprecedented, since outer membrane  
87 proteins possessing  $\alpha$ -helices rather than  $\beta$ -barrels have been described before<sup>19</sup>. Finally, to gain insight  
88 into how Sip6 neutralises Ssp6, a strain carrying both the chromosomal fusions Ssp6-HA and Sip6-  
89 FLAG was generated which exhibits full functionality for both Ssp6 toxicity and Sip6 immunity  
90 (Supplementary Figure 1c). This strain, together with control strains lacking either or both fusions, was  
91 used in a co-immunoprecipitation experiment. Sip6-FLAG was specifically co-precipitated with Ssp6-  
92 HA (Fig. 1f), demonstrating their interaction and suggesting that Sip6 acts directly on Ssp6 rather than  
93 by target protection or modification.

#### 94 **Ssp6 intoxication induces stasis in target cells**

95 To gain insight into the mode of action of Ssp6, we first aimed to determine whether it is a bacteriolytic  
96 effector, causing cell lysis, or a bacteriostatic effector, causing growth inhibition of target cells. We  
97 observed that artificially targeting Ssp6 to the periplasm of *E. coli* by inducing the expression of sp-  
98 Ssp6 resulted in cessation of growth but no drop in optical density, suggesting that Ssp6 is not  
99 bacteriolytic. When the inducer was removed, growth resumed and eventually reached the same optical  
100 density as control cultures lacking the toxin or co-expressing Sip6 (Fig. 2a). Next, we determined  
101 whether the action of Ssp6 in the most physiologically-relevant context, namely when delivered into  
102 target cells by the T6SS of a neighbouring cell, also results in a bacteriostatic effect. Cells of wild type,  
103  $\Delta tssE$  and  $\Delta ssp6$  strains of *S. marcescens* Db10 were mixed with the Ssp6-susceptible target  
104 ( $\Delta ssp6\Delta sip6$ ) on solid media and the growth of attacker and target cells was analysed over 3 h using  
105 time-lapse fluorescence microscopy. In these conditions, target cells in contact with wild type attacker  
106 cells generally failed to proliferate and divide, whilst target cells in contact with attackers unable to  
107 deliver Ssp6 proliferated indistinguishably from the attacking cells (Fig. 2b). The Ssp6-dependent  
108 impact on cell numbers was quantified by determining the fold increase in attacker and target cell  
109 populations between 0 h and 3 h in each condition. This population growth was noticeably reduced in  
110 target cells co-cultured with wild type attackers compared with growth of the attacking cells and of  
111 target cells co-cultured with attackers unable to deliver Ssp6 (Fig. 2c). It is important to note that 100%  
112 inhibition of target cell growth was not expected, since not every contact with an attacker cell or T6SS  
113 firing event would necessarily result in productive effector delivery. Given also that no lysis events  
114 were observed, these single cell microscopy data are consistent with a Ssp6 intoxication causing target  
115 cell stasis.

#### 116 **Ssp6-mediated toxicity causes depolarisation of target cells**

117 The localisation of Sip6 suggested that the bacterial membrane might represent the target of Ssp6-  
118 mediated toxic activity. Since Ssp6 does not share any sequence or predicted structural similarity with  
119 phospholipase enzymes, we investigated whether Ssp6-mediated toxicity can affect the membrane

120 potential and permeability of target cells. The impact of Ssp6 intoxication was analysed in the  
121 physiologically-relevant context, by co-culturing wild type,  $\Delta tssE$  and  $\Delta ssp6$  attacker strains of *S.*  
122 *marcescens* with the Ssp6-susceptible target,  $\Delta ssp6\Delta sip6$ , on solid media. Following co-culture, mixed  
123 populations of attacker and target cells were resuspended and stained with the voltage-sensitive dye  
124 DiBAC<sub>4</sub>(3). This negatively-charged dye is excluded from healthy, well-energised cells, resulting in  
125 low fluorescence. Upon membrane depolarisation, the dye can enter the cells and stain the  
126 cytoplasmic/inner membrane, causing an increase in green fluorescence<sup>20</sup>. Additionally, the samples  
127 were simultaneously stained with propidium iodide (PI), which cannot penetrate intact cells, but can  
128 enter cells with a damaged membrane, causing red fluorescence. Single cell analysis by flow cytometry  
129 revealed that just over 10% of the total population was depolarised when  $\Delta ssp6\Delta sip6$  was co-cultured  
130 with wild type. Of these cells, the majority showed disruption of membrane potential but no loss of  
131 membrane integrity (positive for DiBAC<sub>4</sub>(3) only, green fluorescence), whilst a small fraction showed  
132 both depolarisation and membrane permeabilisation (increased red and green fluorescence). In contrast,  
133 cells treated with polymyxin B, which causes formation of large, non-selective pores leading to cell  
134 permeabilisation and disruption of membrane potential<sup>21</sup>, never showed depolarisation (DiBAC<sub>4</sub>(3)  
135 fluorescence) without concomitant permeabilisation (PI staining). Depolarisation was specific to Ssp6  
136 intoxication, since only background DiBAC<sub>4</sub>(3) and PI fluorescence was observed when  $\Delta ssp6\Delta sip6$   
137 target cells were exposed to  $\Delta tssE$  and  $\Delta ssp6$  attackers (Fig. 3a, Supplementary Fig. 2). Whilst around  
138 10% of the total population was depolarised, this total population contains both healthy attacker and  
139 Ssp6-intoxicated target cells. By considering both viable counts of recovered target cells (Fig. 1c) and  
140 counting of fluorescently labelled attacker and target cells (Supplementary Fig. 3) following co-cultures  
141 under the same conditions used in this experiment, we estimate that target cells represented  
142 approximately 20-35% of the total population following co-culture with the wild type. This suggests  
143 that Ssp6-mediated intoxication had caused detectable membrane depolarisation in around 1/3 of the  
144 target cells at the time of analysis. Finally, we confirmed that a similar pattern of membrane  
145 depolarisation was observed when Ssp6 was expressed in *E. coli*. Upon expression of sp-Ssp6, around  
146 half of the cells were depolarised, with the majority retaining gross membrane integrity (Fig. 3b). As  
147 expected, when Sip6 was co-expressed with sp-Ssp6, the number of DiBAC<sub>4</sub>(3) and PI positive cells  
148 was indistinguishable from that in control cells carrying the empty vector. Overall these results indicate  
149 that Ssp6 can disrupt the membrane potential of target cells in a mechanism that does not involve the  
150 formation of large unspecific pores or gross loss of inner membrane bilayer integrity.

### 151 **Ssp6 forms ion-selective membrane pores *in vitro***

152 Our observations *in vivo*, that Ssp6 intoxication can cause depolarisation of target cells without  
153 increasing membrane permeability for larger compounds such as PI, suggested that Ssp6 could act  
154 though the formation of an ion-selective pore, leading to ion leakage and disruption of membrane  
155 potential. To examine potential pore-forming properties of Ssp6, the protein was purified as a fusion

156 with maltose binding protein (MBP) and found to form higher order oligomers (Supplementary Fig.  
157 4a). The MBP-Ssp6 fusion protein retained toxic activity upon expression in *E. coli*, causing growth  
158 inhibition which was similar to Ssp6 alone and reduced by co-expression of Sip6 (Supplementary Fig.  
159 4b).

160 To test the ability of Ssp6 to form pores, the purified MBP-Ssp6 protein was incorporated into artificial  
161 membranes, under voltage-clamp conditions in non-symmetrical conditions (210 mM KCl in the *trans*  
162 chamber and 510 mM KCl in the *cis* chamber). Incorporation of MBP-Ssp6 generated a current, thus  
163 revealing that Ssp6 could indeed form ion-conducting channels. We observed that the Ssp6-mediated  
164 pore could exist in different opening states (Supplementary Fig. 5ab) and that openings and closings of  
165 the pore were too rapid to accurately measure gating properties. For this reason, we used noise analysis  
166 to determine the ion selectivity. To investigate whether Ssp6 is permeable to cations or anions, we tested  
167 if its reversal potential (calculated according to the Nernst equation) of the current/voltage ( $I/V$ )  
168 relationship in non-symmetrical conditions was shifted towards the equilibrium potential of  $K^+$  or  $Cl^-$ .  
169 In these conditions, the reversal potential was  $-26.5 \pm 4.4$  mV, a value that is very close to the predicted  
170 equilibrium potential of potassium ( $-22.8$  mV), indicating that Ssp6 can form a pore that shows a strong  
171 preference for cations, although a small contribution of  $Cl^-$  cannot be excluded (Fig. 4a). As controls,  
172 we used the purification buffer alone and MBP alone and applied a holding potential of  $+50$  mV. In  
173 these conditions, no currents were observed, confirming that pore formation can be attributed to Ssp6  
174 (Supplementary Fig. 5cd).

175 Given that Ssp6 displays a strong preference for cations, we next examined the relative permeability of  
176  $K^+$ ,  $Na^+$  and  $Ca^{2+}$  to establish if Ssp6 has higher selectivity for monovalent or divalent cations. The  
177 relative  $K^+/Na^+$  permeability ratio ( $P_{K^+}/P_{Na^+}$ ) was assessed under conditions in which  $Na^+$  was the  
178 permeant ion in the *cis* chamber and  $K^+$  was the permeant ion in the *trans* chamber. In these conditions,  
179 the reversal potential was  $2.07 \pm 0.77$  mV, corresponding to  $P_{K^+}/P_{Na^+}$  of  $0.93 \pm 0.03$ , indicating that  
180 under bi-ionic conditions, Ssp6 has a similar selectivity for  $Na^+$  and  $K^+$  (Fig. 4b). To examine the  
181 relative  $K^+/Ca^{2+}$  permeability, we used conditions in which  $K^+$  was the only permeant ion in the *trans*  
182 chamber and  $Ca^{2+}$  was the only permeant ion in the *cis* chamber. In this case, the reversal potential was  
183  $-2.83 \pm 2.08$  mV and the relative  $K^+/Ca^{2+}$  permeability ratio ( $P_{K^+}/P_{Ca^{2+}}$ ) was  $8.80 \pm 1.47$ , highlighting  
184 that the pore formed by Ssp6 is more selective for monovalent cations than divalent cations (Fig. 4c).

185 Finally, given that extrusion of protons ( $H^+$ ) out of the bacterial cytoplasm into the periplasmic space  
186 contributes to maintenance of a negative membrane potential, we tested whether the Ssp6 pore is  
187 permeable to  $H^+$ . In this experiment, 210 mM potassium acetate pH 4.8 was present in the *trans* chamber  
188 and 210 mM potassium acetate pH 7.2 in the *cis* chamber. When the holding potential was 0 mV, no  
189 current was observed (Fig. 4d). In these conditions, the only permeant ions would be  $H^+$  and the driving  
190 force for its movement through the pore would be its chemical gradient. Given that we observed no  
191 current at 0 mV, our results indicate that Ssp6 pore is not permeant to  $H^+$ .



## 192 **Ssp6 intoxication impairs the integrity of the outer membrane**

193 In the previous sections we showed that Ssp6-mediated intoxication causes depolarisation of the inner  
194 membrane of target cells. However, we also observed that its cognate immunity protein, Sip6, is  
195 localised in the outer membrane. Therefore we investigated whether Ssp6 can also damage the outer  
196 membrane of target cells. First, we used the membrane-specific stain FM4-64, a lipophilic dye that can  
197 stain the outer membrane of Gram-negative bacteria<sup>22,23</sup>. When cells of *E. coli* carried an empty vector,  
198 or sp-Ssp6 together with Sip6, the typical evenly-distributed fluorescence of FM4-64 outlining the cells  
199 was observed. However when sp-Ssp6 was expressed in *E. coli*, the red signal was not uniform in its  
200 distribution, showing a tendency to accumulate in ‘spots’, often at the cell poles (Fig. 5a). This  
201 experiment could not be performed using co-cultures of *S. marcescens* Db10, since this organism does  
202 not stain well with FM4-64 for reasons that are not known. Aberrant Ssp6-induced FM4-64 staining in  
203 *E. coli* cells suggested that Ssp6-mediated intoxication might alter the lipid organisation and thus,  
204 potentially, the integrity of the outer membrane. The fluorescent probe 1-*N*-phenyl-naphthylamine (NPN)  
205 was used to determine whether expression of sp-Ssp6 in *E. coli* increases the permeability of the outer  
206 membrane. NPN is unable to cross the outer membrane and displays weak fluorescence in aqueous  
207 solution. However, if the permeability of the outer membrane is increased, NPN can bind strongly to  
208 phospholipids, increasing its fluorescence<sup>24,25</sup>. Expression of sp-Ssp6 in *E. coli* caused a large increase  
209 in NPN uptake, which was similar to the positive control EDTA but not observed in cells carrying the  
210 empty vector or co-expressing Sip6. Therefore Ssp6-mediated intoxication can cause an increase in the  
211 permeability of the outer membrane of target cells, which may be associated with the observed  
212 microscopic changes in FM4-64 staining.

## 213 **Ssp6 defines a new family of cation-selective pore-forming T6SS effectors occurring widely in the** 214 **Enterobacteriaceae**

215 Here we have shown that the anti-bacterial effector Ssp6 is a cation-selective pore-forming toxin.  
216 However it does not share sequence identity or predicted structural homology with previously-described  
217 T6SS effectors, including those proposed to be pore-forming effectors<sup>12,13</sup>. In order to determine how  
218 widely Ssp6-like effectors occur in other organisms, we used HMMER homology searching to  
219 interrogate a database of complete, published bacterial genome sequences. Homologues of Ssp6 were  
220 found to be widespread across the family Enterobacteriaceae. We identified 95 homologues in 38  
221 different species, with up to three Ssp6-like proteins encoded within the genomes of individual strains.  
222 For selected examples, the phylogenetic relationship of the identified Ssp6-like proteins and the genetic  
223 context of their encoding genes is depicted in Fig. 6, with the full set described in Supplementary Fig.  
224 6 and Supplementary Table 3. In each case, a small open reading frame can be identified immediately  
225 downstream of the *ssp6*-like gene which is predicted to encode the corresponding immunity protein  
226 (Fig. 6). Whilst some of these share readily-detectable similarity with Sip6, due to the very small length  
227 of the proteins, we did not attempt further analysis of their phylogeny and relatedness. Examining the



228 genetic context of the *ssp6*-like genes, we observed that this is variable between, and even within,  
229 species. In some cases, Ssp6-like effectors are encoded away from any other T6SS genes, as for Ssp6  
230 itself. In other cases, Ssp6-like effectors are located within T6SS gene clusters, for example in  
231 *Enterobacter cloacae* EcWSU1, or with so-called ‘orphan’ Hcp genes, for example in some strains of  
232 *Klebsiella pneumoniae*, supporting their assignment as T6SS-dependent effector proteins (Fig. 6,  
233 Supplementary Fig. 6).

234 Interestingly, our bioinformatics analysis revealed that *S. marcescens* Db10 possesses a second  
235 homologue of Ssp6, SMDB11\_0810, encoded elsewhere in the genome together with a homologue of  
236 Sip6, SMDB11\_0809 (Fig. 6, Supplementary Fig. 7a). Thus, we tested whether these proteins represent  
237 a novel T6SS effector-immunity pair. We found that a target strain lacking the putative immunity  
238 protein ( $\Delta$ SMDB11\_0810-0809) does not display any reduction in recovery when co-cultured with a  
239 wild type attacking strain compared with a T6SS-inactive attacker. We also tested a target strain lacking  
240 both SMDB11\_0809 and Sip6 ( $\Delta$ ssp6 $\Delta$ sip6,  $\Delta$ SMDB11\_0810-0809), but this strain showed no  
241 sensitivity to SMDB11\_0810, only to Ssp6 (Supplementary Fig. 7b). This lack of SMDB11\_0810  
242 activity is most likely due to a lack of expression, since we did not detect this protein in the total cellular  
243 proteome of *S. marcescens* Db10 grown on solid LB media<sup>16</sup> and have also never detected it in our  
244 secretome studies<sup>14, 15</sup>. Therefore we asked whether SMDB11\_0810 displays any toxicity when  
245 artificially expressed and directed to the periplasm in *E. coli*. In this context, SMDB11\_0810 induces  
246 detectable depolarisation in a small fraction of the cells. Whilst modest, this effect was recovered back  
247 to the level of the empty vector control by the co-expression of the putative immunity protein,  
248 SMDB11\_0809 (Supplementary Fig. 7c). Expression of SMDB11\_0810 also led to an increase NPN  
249 uptake and, therefore outer membrane permeability, albeit to a lesser extent than Ssp6. Again, co-  
250 expression of SMDB11\_0809 was able to reverse the impact of SMDB11\_0810, suggesting that  
251 SMDB11\_0810 possesses at least residual anti-bacterial activity and SMDB11\_0809 represents a  
252 functional cognate immunity protein.

253

## 254 Discussion

255 In this study, we have determined the mode of action by which a novel T6SS effector, Ssp6, causes  
256 growth inhibition in intoxicated bacterial cells. We have demonstrated that Ssp6 acts by forming cation-  
257 specific channels, leading to inner membrane depolarisation and thus cell de-energisation, and that Ssp6  
258 intoxication can also lead to increased outer membrane permeability. Importantly, Ssp6 is the founding  
259 member of a new family of T6SS-delivered, ion-selective pore-forming toxins, which are distinct from  
260 previously-described T6SS-effector proteins, including those proposed to form channels or pores.

261 To date, two T6SS-dependent effectors causing membrane depolarisation have been identified, VasX  
262 and Tse4<sup>12, 13</sup>. VasX displays some structural homology with pore-forming colicins and was shown to

263 disrupt the membrane potential with simultaneous permeabilisation of the inner membrane<sup>13, 26, 27</sup>.  
264 Conversely, Tse4 disrupts the membrane potential without compromising the membrane permeability  
265 of intoxicated cells<sup>12</sup>. Thus, VasX is thought to form a large, non-selective pore, which would cause  
266 leakage of ions and other cellular contents<sup>13, 27, 28</sup>, whilst Tse4 was suggested to form a cation-selective  
267 pore<sup>12</sup>. Whilst we did not detect sequence or predicted structural similarity between Ssp6 and Tse4 or  
268 VasX, our data showed that Ssp6 can cause depolarisation of targeted cells without a corresponding  
269 increase in permeability of the inner membrane, suggesting that the Ssp6 and Tse4 modes of action may  
270 be similar. We speculate that the reason why a small fraction of the cells depolarised by Ssp6 also show  
271 an increase in membrane permeability is due to a downstream, secondary effect of being unable to  
272 maintain proper membrane or cell wall integrity.

273 Importantly, for the first time, we confirmed the ability of a T6SS effector, Ssp6, to form an ion-  
274 selective pore *in vitro* using artificial membranes. Ssp6 displayed a preference for monovalent cations  
275 compared with divalent cations, whilst surprisingly being impermeant to protons. The electron transport  
276 chain generates an electrochemical gradient of protons, the proton motive force (PMF), by extrusion of  
277 protons across the bacterial inner membrane<sup>29</sup>. The PMF is comprised of the transmembrane electrical  
278 potential,  $\Delta\Psi$  (negative inside the cell), and the transmembrane pH gradient,  $\Delta\text{pH}$ <sup>30, 31</sup>. PMF is used to  
279 actively transport solutes against their electrochemical gradient, determining accumulation of  $\text{K}^+$  within  
280 the cell and extrusion of  $\text{Na}^+$  outside the cell<sup>32, 33</sup>. These processes contribute to generating an  
281 electrochemical gradient and maintaining the  $\Delta\Psi$  component of the PMF<sup>29</sup>. Based on the *in vitro* data,  
282 dissipation of the membrane potential through the action of Ssp6 is caused by an influx of cations into  
283 the cell. Whilst ion concentrations inside and outside bacterial cells can vary with growth and  
284 physiological conditions, in this study, co-culture assays measuring Ssp6 intoxication were performed  
285 on solid LB media containing 170 mM NaCl (with only residual  $\text{K}^+$ , around 3-6 mM). Thus we speculate  
286 that the high concentration of  $\text{Na}^+$  outside of the cells, compared with the cytoplasm, will generate a  
287  $\text{Na}^+$  electrochemical gradient that represents the driving force to cause influx of  $\text{Na}^+$  through Ssp6 pores,  
288 thereby dissipating the  $\Delta\Psi$  component of the PMF. Since Ssp6 pores were shown to be impermeant to  
289  $\text{H}^+$ , the  $\Delta\text{pH}$  component would not be affected, as also reported for Tse4<sup>12</sup>.

290 Consistent with the ion-selective membrane depolarisation mechanism defined *in vitro*, intoxication by  
291 Ssp6 caused growth inhibition rather than cell lysis *in vivo*. In contrast, it has been reported that colicins,  
292 such as colicin E1 and N, which form a non-specific pore in the membrane of susceptible cells will  
293 ultimately cause lysis<sup>34-36</sup>. Nevertheless, depolarisation alone results in ATP depletion and general  
294 disruption of normal cell functions, such as Sec- and Tat-dependent protein export or solute and nutrient  
295 transport<sup>29, 37-41</sup>. Thus we hypothesize that whilst formation of non-selective pores allowing passage of  
296 large molecules could cause a more drastic leakage of cell contents and typically lead to lysis of  
297 intoxicated cells, formation of a cation-selective pore, such as Ssp6, has less drastic effects which are  
298 nevertheless sufficient to cause growth inhibition.

299 In general, pore-forming toxins (PFTs) can be classified into two large groups,  $\alpha$ -PFTs and  $\beta$ -PFTs,  
300 based on whether their membrane spanning domain is composed of  $\alpha$ -helices or  $\beta$ -barrels<sup>42-44</sup>. Whilst  
301 structural information will be required to fully understand the arrangement and mechanism of Ssp6  
302 pores, secondary structure predictions indicate substantial  $\alpha$ -helical content and thus likely an  $\alpha$ -PFT  
303 classification.  $\beta$ -PFTs oligomerise at the membrane surface, forming an intermediate pre-pore which  
304 will then insert into the membrane upon reaching a threshold size<sup>45,46</sup>. For  $\alpha$ -PFTs, membrane insertion  
305 and oligomerisation are concomitant processes that can lead to formation of partially-assembled but  
306 active pores or complete pores<sup>47,48</sup>. In both cases, oligomerisation and insertion in the membrane is  
307 observed when a critical concentration of monomers is reached<sup>42</sup>. In contrast with immunity proteins  
308 for colicin PFTs, which have been reported to be localised in the inner membrane<sup>49,50</sup>, Sip6 is localised  
309 in the outer membrane. Localisation of Sip6 in the outer membrane may represent a means to sequester  
310 incoming Ssp6 away from the inner membrane and prevent free Ssp6 from reaching a critical  
311 concentration for pore formation. Its localisation might additionally reflect a second function in  
312 avoiding direct Ssp6 damage to the outer membrane. Apart from phospholipase effectors which are  
313 likely to be able to affect the inner leaflet of the outer membrane, to date there are no reports of T6SS-  
314 dependent effectors which directly damage the outer membrane. Whilst our data reveal that Ssp6  
315 intoxication can increase outer membrane permeability and perhaps modify the distribution of its lipids,  
316 they do not distinguish between damage to the outer membrane being directly caused by Ssp6 and an  
317 indirect effect of Ssp6 downstream of inner membrane depolarisation.

318 Finally, we asked whether Ssp6 is unique to *Serratia marcescens* or if this type of T6SS effector occurs  
319 more widely. Analysis of whole-genome sequencing data revealed that homologues of Ssp6 are  
320 restricted to the Enterobacteriaceae but occur widely within this family, in at least 38 different species.  
321 This is likely to be an underestimate since our HHMER analysis was performed using only complete,  
322 published genome sequences, whereas initial analysis identified further homologues in, for example,  
323 clinical isolates of *E. coli* whose genomes were not fully sequenced. Ssp6-like effectors, like many anti-  
324 bacterial T6SS effectors, appear to be horizontally acquired, being present in only some strains of a  
325 given species and with variable genetic locations. In some cases, genes encoding Ssp6-like proteins are  
326 within a main T6SS gene cluster (encoding most or all of the structural and regulatory components  
327 making up the machinery) or in distant 'orphan' loci containing *hcp* genes. Genes encoding components  
328 of the expelled puncturing structure, Hcp, VgrG and PAAR proteins, are often present in multiple  
329 copies, with individual homologues required for delivery of particular effectors. In many cases,  
330 effectors are genetically linked with their cognate delivery protein<sup>1</sup>. Thus Ssp6-like proteins encoded  
331 adjacent to orphan *hcp* genes (or linked with an *hcp* gene in a T6SS gene cluster) are likely to be  
332 dependent on interaction with that Hcp homologue for their delivery. This is in agreement with previous  
333 findings consistent with Ssp6 being an Hcp-dependent effector in *S. marcescens* Db10<sup>14</sup>. One interesting  
334 example of *ssp6* context is in *Enterobacter cloacae* EcWSU1, which possesses a very similar T6SS

335 gene cluster to *S. marcescens* Db10. In EcWSU1, the *ssp6*-like gene is present between *tssC* and *hcp*  
336 within this T6SS gene cluster, in the same position as the peptidoglycan hydrolase effector-immunity  
337 pair *ssp1-raplA* in Db10, consistent with the idea of this being an effector acquisition/exchange  
338 hotspot<sup>51</sup>. This analysis also revealed the presence of a second Ssp6-Sip6-like pair of proteins encoded  
339 in the genome of *S. marcescens* Db10, SMDB11\_0810 and \_0809. Given that these are not expressed  
340 under our normal conditions, and show only limited activity when overexpressed in an equivalent  
341 manner to that in which we studied Ssp6, we speculate that they might be expressed and show higher  
342 efficacy under quite different physiological or environmental conditions. The idea of conditional  
343 effector efficacy has been supported by studies in *P. aeruginosa*<sup>12</sup> and the fact that several effectors of  
344 the same family are often observed in the same organism may support the idea that two related effectors  
345 with different regulation and/or specificity could provide a bet-hedging strategy to deal with different  
346 conditions and competitors. For example, Db10 itself possesses two related Tae4-family peptidoglycan  
347 hydrolase effectors with distinct substrate specificity *in vitro* and different efficacy *in vivo*<sup>51, 52</sup>.

348 In conclusion, this study has revealed that Ssp6 is the founder member of a new family of T6SS-  
349 dependent, cation-selective pore-forming anti-bacterial effectors. This toxic activity leads to  
350 depolarisation of the inner membrane, disruption of outer membrane integrity and, consequently, to  
351 inhibition of growth in targeted cells. We propose that this family could be named Tpe1, as the first  
352 example of a T6SS-dependent pore-forming effector whose activity has been confirmed *in vitro*. At the  
353 molecular level, it will be of great interest to determine how these proteins are able to generate a gated  
354 pore with such defined ion selectivity, allowing mono- and di-valent metal cations, but not protons, to  
355 pass through a membrane. At the population level, Ssp6-family effectors further expand the already-  
356 impressive repertoire of toxins bacteria can deploy to compete with each other. Elucidating the basis of  
357 competitive inter-bacterial interactions is vital to understand and utilise their capacity to shape the  
358 composition and dynamics of diverse polymicrobial communities, including those important for health,  
359 disease and biotechnological applications.

360

## 361 **Material and Methods**

### 362 **Bacterial strains and plasmids**

363 Bacterial strains and plasmids used in this study are detailed in Supplementary Table 1. Strains of *S.*  
364 *marcescens* Db10 carrying in-frame deletions or encoding epitope-tagged fusion proteins at the normal  
365 chromosomal location were generated by allelic exchange using the plasmid pKNG101<sup>53</sup>.  
366 Streptomycin-resistant derivatives were generated by transduction of the resistance gene from *S.*  
367 *marcescens* Db11, as previously described<sup>51</sup>. Primer sequences and details of construction are provided  
368 in Supplementary Table 2. Plasmids for constitutive expression of genes *in trans* were derived from  
369 pSUPROM while plasmids for arabinose-inducible expression were derived from pBAD18-Kn. Strains  
370 of *S. marcescens* were grown at 30°C on LB agar (LBA, 10 g/L tryptone, 5 g/L yeast extract, 10 g/L  
371 NaCl, 12 g/L agar), in liquid LB (10 g/L tryptone, 5 g/L yeast extract, 5 g/L NaCl) or in minimal media  
372 (40 mM K<sub>2</sub>HPO<sub>4</sub>, 15 mM KH<sub>2</sub>PO<sub>4</sub>, 0.1% [NH<sub>4</sub>]<sub>2</sub>SO<sub>4</sub>, 0.4 mM MgSO<sub>4</sub>, 0.2% [w/v] glucose), whilst for  
373 *E. coli* growth was at 37°C. When required, media were supplemented with kanamycin (Kn) 100 µg/ml,  
374 streptomycin (Sm) 100 µg/ml, or ampicillin (Ap) 100 µg/ml.

### 375 **Immunodetection of cellular and secreted proteins**

376 Detection of Hcp in cellular and secreted fractions of cultures grown for 5 h in LB was performed as  
377 described<sup>51</sup>. For detection of Ssp6-HA, bacterial strains were grown for 5 h in LB. Cellular protein  
378 samples were prepared by resuspending cells recovered from 200 µL of culture in 100 µL of 2x SDS  
379 sample buffer (100 mM Tris-HCl [pH 6.8], 3.2% SDS, 3.2 mM EDTA, 16% glycerol, 0.2 mg/mL  
380 bromophenol blue, 2.5% β-mercaptoethanol). Secreted protein samples were prepared by precipitation  
381 from 15 ml of culture supernatant and resuspension in a final volume of 40 µL, according to the method  
382 described previously<sup>51</sup>. Ssp6-HA was detected using anti-HA primary antibody (MRC PPU Reagents,  
383 University of Dundee, 1:6,000) and HRP-conjugated anti-mouse secondary (1:10,000; Bio-Rad).

### 384 **Co-culture assays for T6SS-mediated antibacterial activity**

385 T6SS-mediated anti-bacterial activity of strains of *S. marcescens* Db10 was measured as described<sup>51,53</sup>.  
386 In brief, attacker and target strains were normalised to OD<sub>600</sub> 0.5, mixed at a 1:1 ratio and co-cultured  
387 on solid LB at 30°C for 4 h unless stated otherwise. The number of surviving target cells was  
388 enumerated by serial dilution and viable counts on Sm-supplemented LB agar, with all target strains  
389 being Sm-resistant derivatives of the wild type or mutant of interest.

### 390 **Growth inhibition upon heterologous toxin expression**

391 To study the impact of heterologous expression of Ssp6 from pBAD18-Kn-derived plasmids, freshly-  
392 transformed cells of *E. coli* MG1655 grown overnight on solid media were adjusted to OD<sub>600</sub> of 1,  
393 serially diluted and 5 µl spotted onto LB plates containing either 0.2% D-glucose or 0.2% L-arabinose.  
394 For growth rate measurement in liquid culture, cultures were inoculated to a starting OD<sub>600nm</sub> 0.02 in a

395 volume of 25 mL LB and incubated at 30 °C at 200 rpm. Optical density at 600 nm (OD<sub>600</sub>) readings  
396 were acquired every 1 h. Expression from pBAD18-Kn-derived plasmids was induced with 0.2% L-  
397 arabinose at OD<sub>600</sub> 0.2.

### 398 **Immunoprecipitation of Ssp6-HA and Sip6-FLAG**

399 Cultures of *S. marcescens* strains carrying chromosomally-encoded Ssp6 with a C-terminal HA tag  
400 (Ssp6-HA) and/or Sip6 with a C-terminal triple FLAG tag (Sip6-FLAG) were grown in LB for 5 h to  
401 an OD<sub>600</sub> of ~4.5. Cells were recovered by centrifugation at 4000 g for 20 min, resuspended in 50 mM  
402 Tris-HCl pH 7.8 and lysed using an EmulsiFlex-C3 homogenizer (Avestin). Cell debris were removed  
403 by centrifugation (14,000 g, 45 min, 4°C) and 1 ml of lysate (corresponding to 50 ml of the original  
404 culture) was transferred into tubes containing 50 µl of pre-washed (3x) magnetic α-HA beads (NEB)  
405 and incubated for 2 h at 4°C, 20 rpm. The beads were then washed with 4 x 1 ml of wash buffer (20  
406 mM Tris-HCl pH 7.8, 100 mM NaCl, 0.1% Triton X-100) and bound proteins were eluted by addition  
407 of 40 µl of 2x SDS sample buffer.

### 408 **Inner and outer membrane fractionation**

409 Cultures of *S. marcescens* were grown in 25 mL LB for 5 h to an OD<sub>600</sub> of approximately 3. Cells were  
410 recovered by centrifugation at 4000 g, 4°C for 10 min and resuspended in 1 mL of 50 mM Tris-HCl pH  
411 8. Cells were then lysed by sonication, unbroken cells removed by centrifugation (14,000g, 20 min,  
412 4°C) and the cell-free lysate subjected to ultracentrifugation (200,000 g, 30 min, 4°C). The resulting  
413 supernatant was collected and represented the cytoplasm fraction. The pellet was resuspended in 1 mL  
414 of 50 mM Tris-HCl pH 8 and a small aliquot removed, representing the total membrane fraction. The  
415 detergent C8POE (octyl-poly-oxyethylenoxide) (Bachem) was then added to a final concentration of  
416 2%, incubated at 37°C for 30 min and a second ultracentrifugation step performed (200,000 g, 30 min,  
417 4°C). The resulting supernatant was collected, representing the outer membrane fraction in *S.*  
418 *marcescens*, while the pellet was resuspended in 1 mL of 50 mM Tris-HCl pH 8, representing the *S.*  
419 *marcescens* inner membrane fraction. Equal volumes of each fraction (corresponding to material from  
420 the equivalent number of cells) were separated by SDS-PAGE and subjected to immunoblotting. Anti-  
421 FLAG antibody (Sigma) for detection of Sip-FLAG was used at, 1:10,000, while anti-EFTu (Hycult  
422 Biotech) was used 1:20,000, both with horseradish peroxidase (HRP)-conjugated anti-mouse secondary  
423 antibody (1:10,000; Bio-Rad). Anti-OmpA antibody<sup>54</sup> was used at 1:20,000 and a custom anti-TssL  
424 antibody (Eurogentec; see Supplementary Fig. 8) was used at 1:6,000, both with peroxidase-conjugated  
425 anti-rabbit secondary antibody (Bio-Rad, 1:10,000).

### 426 **Membrane potential and membrane permeability analysis**

427 For analysis of co-cultures, attacker and target strains of *S. marcescens* Db10 were co-cultured on solid  
428 LB media for 4 h at 30°C, then cells were recovered and suspended in 1x PBS at 10<sup>6</sup> cells/ mL.  
429 DiBAC<sub>4</sub>(3) (Bis-[1,3-Dibutylbarbituric Acid] Trimethine Oxonol; Thermo) at 10 µM final



430 concentration and propidium iodide at 1  $\mu\text{M}$  final concentration were added simultaneously to each cell  
431 suspension, followed by incubation in the dark for 30 min. For analysis of plasmid-based expression of  
432 sp-Ssp6, cultures of *E. coli* MG1655 carrying pBAD18-Kn derived plasmids were inoculated to a  
433 starting  $\text{OD}_{600}$  of 0.02 in 25 mL LB and incubated at 37°C for 1.5 h, then induced by the addition of  
434 0.2% L-arabinose and grown for a further 1 h. Cells were then recovered and resuspended in 1x PBS  
435 and DiBAC<sub>4</sub>(3) and propidium iodide staining was performed as above. As a control, cells were treated  
436 with polymyxin B (300  $\mu\text{g}/\text{mL}$  for *S. marcescens* and 2  $\mu\text{g}/\text{mL}$  for *E. coli*) at 37 °C for 30 min prior to  
437 staining. Following staining with DiBAC<sub>4</sub>(3) and propidium iodide, cells were directly analysed in a  
438 FACS LRS Fortessa equipped with 488 nm and 561 nm lasers (Becton Dickinson), using thresholds on  
439 side and forward scatter to exclude electronic noise. Channels used were Alexa 488 (Ex 488 nm, Em  
440 530/30nm) for DiBAC<sub>4</sub>(3) and Alexa 568 (Ex 561 nm, Em 610/20 nm) for propidium iodide. All  
441 bacterial suspensions were normalised to 10<sup>6</sup> cells/ mL prior to analysis. Analysis was performed using  
442 FlowJo v10.4.2 (Treestar Inc.); example plots can be seen in Supplementary Fig. 2.

#### 443 **NPN uptake assay**

444 Cultures of *E. coli* MG1655 carrying pBAD18-Kn derived plasmids were inoculated to a starting  $\text{OD}_{600}$   
445 of 0.02 in 25 mL LB and incubated at 37 °C for 1.5 h, then induced by the addition of 0.2% L-arabinose  
446 and grown for a further 1 h. Cells were normalised to  $\text{OD}_{600}$  0.7, washed twice with NPN assay buffer  
447 (5 mM HEPES pH 7.2, 5 mM glucose) and resuspended in NPN assay buffer to a final  $\text{OD}_{600}$  of 1.4 as  
448 previously described<sup>24,25</sup>. The assay was prepared in a 96-well optical-bottom black plate (Thermo), by  
449 addition of 20  $\mu\text{M}$  NPN (1-N-phenyl-naphthylamine, Sigma) in a final volume of 200  $\mu\text{L}$ . EDTA was  
450 added to a final concentration of 10 mM as a control for outer membrane permeabilization. Fluorescence  
451 changes were monitored using a Clariostar Monochromator Microplate reader (BMG Labtech), with a  
452 wavelength of 355 nm for excitation and 405 nm for emission. NPN uptake was calculated, as  
453 previously described<sup>25</sup>, with the following formula:

$$454 \text{NPN uptake} = (F_{\text{obs}} - F_B) - (F_{\text{control}} - F_B)$$

455 where  $F_{\text{obs}}$  represents the NPN fluorescence observed with *E. coli* strains carrying the test plasmids,  $F_B$   
456 is the fluorescence in the absence of bacterial cells and  $F_{\text{control}}$  is the fluorescence with *E. coli* cells  
457 lacking a plasmid.

#### 458 **FM-64 staining**

459 For membrane staining using FM4-64 (Thermo), cultures of *E. coli* MG1655 carrying pBAD18-Kn  
460 derived plasmids were inoculated to a starting  $\text{OD}_{600}$  of 0.02 in 25 mL LB and incubated at 37°C for  
461 1.5 h. When the exponential phase was reached ( $\text{OD}_{600}$  of 0.15-0.2), gene expression was induced by  
462 the addition of 0.2% L-arabinose followed by a further 1 h incubation. FM4-64 was added to a final  
463 concentration of 1  $\mu\text{M}$  and samples were incubated at 37°C for 20 min. Three  $\mu\text{L}$  of stained cells were



464 placed on a microscope slide layered with a pad of M9 media<sup>55</sup> solidified by the addition of 1.5%  
465 agarose. Imaging was performed as described in the following section.

#### 466 **Fluorescence Microscopy**

467 For time-lapse experiments (Figure 2), cells of *S. marcescens* were pre-grown for 4 h in liquid minimal  
468 media to an OD<sub>600</sub> of ~0.3-0.4. Cultures were then normalized to OD<sub>600</sub> 0.2, mixed in a ratio of 3:1  
469 attacker:target, and 2 µL of the mixture placed on a pad of minimal media solidified by the addition of  
470 1.5% UltraPure agarose (Invitrogen). Fluorescence imaging was performed using a DeltaVision Core  
471 widefield microscope (Applied Precision) mounted on an Olympus IX71 inverted stand with an  
472 Olympus 100X 1.4 NA lens and Cascade2\_512 EMCCD camera with differential interference contrast  
473 (DIC) and fluorescence optics. Images were acquired with the following parameters: 512 × 512 pixels,  
474 2-by-2 binning, with 11 Z sections spaced by 0.2 µm. GFP (target cells) and mCherry (attacker cells)  
475 were detected using a GFP filter set (Ex 485/20 nm, Em 530/25 nm) and mCherry filter set (Ex 542/82  
476 nm, Em 603/78 nm), respectively. Independent fields of view were located and their XYZ positions  
477 were stored in order to capture images of the same coordinates every 30 min for 3 hours. Images were  
478 manually corrected for drift and, where necessary, adjusted for any loss of fluorescence during the  
479 timecourse.

480 Post-acquisition, images were deconvolved using softWoRx and stored and processed using OMERO  
481 software (<http://openmicroscopy.org>)<sup>56</sup>. Quantification of attacker and target cells was done using  
482 OMERO.mtools (<http://www.openmicroscopy.org/site/products/partner/omero.mtools>). All attacker  
483 strains carried cytoplasmic mCherry while target strains carried cytoplasmic GFP (Supplementary  
484 Table 1). For time-lapse experiments, microcolonies were chosen for analysis on the basis that they  
485 contained attacker and target cells which were in direct contact to allow T6SS-mediated attacks. The  
486 number of attacker and target cells in the microcolonies were counted at time point 0 h and 3 h. At least  
487 70 cells (at t = 0 h) per strain per replicate were counted for the attackers and 19 cells per replicate were  
488 counted for the targets.

489 To quantify the relative number of attacker and target cells following co-culture under the conditions  
490 used for membrane potential and permeability staining (co-culture of attacker and target strains on solid  
491 LB media for 4 h at a starting ratio of 1:1, Fig. 3a), cells were recovered at the end of the co-culture,  
492 resuspended in LB and imaged as described above. Between 1450 and 1600 total cells (mixed target  
493 and attackers) per replicate for each condition were counted.

494 In the case of FM4-64 staining, imaging was performed using a CoolSnap HQ2 camera (Photometrics),  
495 with differential interference contrast (DIC) and fluorescence optics. Images were acquired with the  
496 following parameters: 512 × 512 pixels, 1-by-1 binning, with 11 Z sections spaced by 0.2 µm. FM4-64  
497 fluorescence was detected using a TRITC (tetramethylrhodamine) filter set (Ex 540/25 nm, Em 605/55  
498 nm). Images were adjusted for clear visualisation of the cell outline in each case.

## 499 **Purification of MBP-Ssp6**

500 For purification of MBP-Ssp6, *E. coli* C43 (DE3) cells transformed with a pNIFTY-MBP-derived  
501 plasmid encoding Ssp6 fused with N-terminal MBP were inoculated to a starting OD<sub>600</sub> 0.05 in 4 L LB,  
502 grown at 30°C, 200 rpm for 3 h, induced with 0.5 mM IPTG and then incubated for 16 h at 16°C. Cells  
503 were recovered by centrifugation (4000 g, 30 min), resuspended in 40 ml of Buffer A (50 mM Tris-HCl  
504 pH 8, 500 mM NaCl) in presence of cOmplete™ EDTA-free protease inhibitor (Sigma) and lysed using  
505 an EmulsiFlex-C3 homogenizer (Avestin). The lysate was cleared by centrifugation (14,000 g, 45 min,  
506 4°C), filtered through a 0.45 µm filter, and loaded onto 1 mL MBP Trap™ HP column (GE Healthcare)  
507 following equilibration with Buffer A. Elution was achieved using 10 column volumes of Buffer B (50  
508 mM Tris-HCl pH 8, 500 mM NaCl, 10 mM maltose). The eluted fraction was separated by size  
509 exclusion chromatography using a Superose 6 Increase 10/300 column (GE Healthcare) and a buffer  
510 containing 50 mM Tris-HCl pH 8, 150 mM NaCl, 10% glycerol.

## 511 **Electrophysiology measurements and analysis**

512 Planar lipid bilayers were prepared as described previously<sup>57</sup>. Briefly, bovine phosphatidylethanolamine  
513 lipids (Stratech Scientific Ltd) were resuspended in decane at a final concentration of 30 mg/mL. Planar  
514 phospholipid bilayers were formed across a 150 µm diameter aperture in a partition that separates two  
515 1 mL compartments, the *cis* and the *trans* chambers. MBP-Ssp6 was added to the *cis* chamber. The  
516 *trans* chamber was held at 0 mV (ground potential) while the *cis* chamber was clamped at different  
517 holding potentials relative to ground. The transmembrane current was measured under voltage clamp  
518 conditions using a BC-525C amplifier (Warner Instruments, Harvard Instruments). Channel recordings  
519 were low-pass filtered at 10 kHz with a four-pole Bessel filter, digitized at 100 kHz using a National  
520 Instruments acquisition interface (NIDAQ-MX, National Instruments, Austin, TX) and  
521 recorded on a computer hard drive using WinEDR 3.05 Software (John Dempster, University of  
522 Strathclyde, Glasgow, UK). Current fluctuations were measured over  $\leq 30$ s and recordings were then  
523 filtered with WinEDR 3.8.6 low pass digital filter at 800 Hz (-3dB) using a low pass digital filter  
524 implemented in WinEDR 3.05. For experiments in which a nonsymmetrical KCl gradient was used, the  
525 KCl solution in the *cis* chamber contained 510 mM KCl, 10 mM HEPES pH 7.2, while the KCl solution  
526 in the *trans* chamber contained 210 mM KCl, 10 mM HEPES pH 7.2. For bi-ionic relative permeability  
527 studies, the KCl solution contained 210 mM KCl, 10 mM HEPES pH 7.2; the NaCl solution contained  
528 210 mM NaCl, 10 mM HEPES pH 7.2; and the CaCl<sub>2</sub> solution contained 210 mM CaCl<sub>2</sub>, 10 mM  
529 HEPES pH 7.2.

530 Noise analysis was performed by subdividing current recordings into segments in time, with each  
531 segment containing N samples. For each holding potential, current fluctuations were measured over 20-  
532 30 s. For each segment, the mean current was plotted against time and computed using the following  
533 formula:

$$I_{\text{mean}} = \frac{\sum_{i=1}^N I(i)}{N}$$

535 Where  $I(i)$  is the amplitude of the  $i$ th current and  $N$  is the number of the samples in the analysed segment.

536 The mean data obtained from multiple replicates were subsequently plotted as a function of voltage.

537 Predicted reversal potentials were calculated using the Nernst equation.

538 The relative permeability ratio when comparing relative permeability of monovalent cations was  
539 calculated using the Goldman-Hodgkin-Katz equation<sup>58, 59</sup>:

$$540 P_X/P_Y = [Y^+]/[X^+] \cdot \exp(-E_{\text{rev}}F/RT)$$

541 Where  $R$  is the ideal gas constant ( $8.314 \text{ J mol}^{-1}$ ),  $T$  is the temperature expressed in kelvin,  $F$  is the  
542 Faraday constant ( $9.6485 \times 10^4 \text{ C mol}^{-1}$ ) and  $E_{\text{rev}}$  is the reversal potential, which was taken to be the  
543 holding potential at which transmembrane current fluctuations were at a minimum.

544 The relative monovalent to divalent cations permeability ratio was calculated using the Fatt-Ginsborg  
545 equation<sup>60</sup>

$$546 P_X/P_Y = [Y^+]/4[X^{2+}] \cdot \exp(-E_{\text{rev}}F/RT) \cdot \exp(E_{\text{rev}}F/RT + 1)$$

547 Junction potentials were calculated using Clampex software version 10.2 (Molecular Devices) and  
548 subtracted from the reversal potential obtained for each experiment.

## 549 **Identification of Ssp6-like effector family**

550 1. Selection of genome sequences. Genome sequences were downloaded from the RefSeq database<sup>61</sup>  
551 ([ftp://ftp.ncbi.nlm.nih.gov/genomes/ASSEMBLY\\_REPORTS/assembly\\_summary\\_refseq.txt](ftp://ftp.ncbi.nlm.nih.gov/genomes/ASSEMBLY_REPORTS/assembly_summary_refseq.txt), as of 4th  
552 Feb 2019). Genome sequences that were designated “Complete Genomes” and had previously been  
553 published were selected for analysis. Genomes were annotated using prokka (v1.13.3)<sup>62</sup> and CDS  
554 protein sequences extracted using a custom script (gff\_to\_faa.py). Genomes were selected for further  
555 analysis based on possession of both at least one gene encoding an Ssp6-like protein, and at least one  
556 T6SS-encoding gene cluster. To achieve these criteria, two steps were performed. First, hmmsearch  
557 from the HMMER suite (v 3.1b2)<sup>63</sup> was used to identify genomes containing genes encoding Ssp6-like  
558 proteins, based on a small, manually-curated alignment of non-redundant Ssp6 homologues which had  
559 originally been identified using BLASTp; the cutoff value was a HMMER bit score of 20 over the  
560 overall sequence/profile comparison. Second, T6SS-encoding gene clusters were identified as a locus  
561 containing at least 9 T6SS component genes (components identified using HMMER, cutoff value as  
562 above) in a contiguous set with no more than 8 unrelated genes between each known T6SS gene,  
563 performed using a custom script (hamburger.py). HMM models were taken from PFAM, or created  
564 from protein sequences stored in the Secret6 database (using hmmbuild) for accessory and core  
565 components of the T6SS respectively. All models and the alignments they are based on (if applicable)

566 are stored in <https://github.com/djw533/ssp6-paper/tree/master/models>. All custom scripts can be found  
567 at <https://github.com/djw533/ssp6-paper/tree/master/scripts>.

568 2. Extraction and analysis of Ssp6-like protein sequences and genetic loci. Ssp6-encoding loci of  
569 approximately 20K nucleotides (10 Kb upstream and downstream of the Ssp6 HMMER hit) were  
570 extracted using the script `hamburger.py` from genome sequences that satisfied the requirements stated  
571 in part 1. Extracted loci were then subsequently analysed for possession of T6SS related genes  
572 using `hamburger.py` a second time, as in part 1. Ssp6-like protein sequences were aligned using  
573 MUSCLE (v3.8.31)<sup>64</sup> and trees drawn using IQTREE (v1.6.5)<sup>65</sup> with 1000 ultrafast bootstraps. Trees  
574 were visualised using the R package `ggtree` (v1.15.6)<sup>66</sup>, and associated genomic context depicted using  
575 `ggplot2` (v3.1.1)<sup>67</sup> and `gggenes` (v0.3.2) (<https://cran.r-project.org/web/packages/gggenes/>). An R script  
576 ([https://github.com/djw533/ssp6-paper/blob/master/scripts/Plotting\\_ssp6\\_figures.R](https://github.com/djw533/ssp6-paper/blob/master/scripts/Plotting_ssp6_figures.R)) was used to plot  
577 figures from the above results (stored at <https://github.com/djw533/ssp6-paper/tree/master/results>).

578

#### 579 **Data availability statement**

580 All data supporting the findings of this study are available within the paper and its supplementary  
581 information files.

582

## 583 References

- 584 1. Coulthurst, S. The Type VI secretion system: a versatile bacterial weapon. *Microbiology*  
585 (2019).
- 586 2. Taylor, N.M.I., van Raaij, M.J. & Leiman, P.G. Contractile injection systems of bacteriophages  
587 and related systems. *Mol Microbiol* **108**, 6-15 (2018).
- 588 3. Brackmann, M., Nazarov, S., Wang, J. & Basler, M. Using Force to Punch Holes: Mechanics  
589 of Contractile Nanomachines. *Trends Cell Biol* **27**, 623-632 (2017).
- 590 4. Clemens, D.L., Lee, B.Y. & Horwitz, M.A. The Francisella Type VI Secretion System. *Front*  
591 *Cell Infect Microbiol* **8**, 121 (2018).
- 592 5. Nguyen, V.S. *et al.* Towards a complete structural deciphering of Type VI secretion system.  
593 *Current Opin Struct Biol* **49**, 77-84 (2018).
- 594 6. Koskiniemi, S. *et al.* Rhs proteins from diverse bacteria mediate intercellular competition. *Proc*  
595 *Natl Acad Sci U S A* **110**, 7032-7037 (2013).
- 596 7. Ma, L.S., Hachani, A., Lin, J.S., Filloux, A. & Lai, E.M. *Agrobacterium tumefaciens* deploys a  
597 superfamily of type VI secretion DNase effectors as weapons for interbacterial competition in  
598 planta. *Cell Host Microbe* **16**, 94-104 (2014).
- 599 8. Russell, A.B. *et al.* Diverse type VI secretion phospholipases are functionally plastic  
600 antibacterial effectors. *Nature* **496**, 508-512 (2013).
- 601 9. Russell, A.B. *et al.* A Widespread Bacterial Type VI Secretion Effector Superfamily Identified  
602 Using a Heuristic Approach. *Cell Host Microbe* **11**, 538-549 (2012).
- 603 10. Tang, J.Y., Bullen, N.P., Ahmad, S. & Whitney, J.C. Diverse NADase effector families mediate  
604 interbacterial antagonism via the type VI secretion system. *J Biol Chem* **293**, 1504-1514 (2018).
- 605 11. Whitney, J.C. *et al.* Identification, structure, and function of a novel type VI secretion  
606 peptidoglycan glycoside hydrolase effector-immunity pair. *J Biol Chem* **288**, 26616-26624  
607 (2013).
- 608 12. LaCourse, K.D. *et al.* Conditional toxicity and synergy drive diversity among antibacterial  
609 effectors. *Nature Microbiol* (2018).
- 610 13. Miyata, S.T., Unterweger, D., Rudko, S.P. & Pukatzki, S. Dual expression profile of type VI  
611 secretion system immunity genes protects pandemic *Vibrio cholerae*. *PLoS Pathog* **9**, e1003752  
612 (2013).
- 613 14. Cianfanelli, F.R. *et al.* VgrG and PAAR Proteins Define Distinct Versions of a Functional Type  
614 VI Secretion System. *PLoS Pathog* **12**, e1005735 (2016).
- 615 15. Fritsch, M.J. *et al.* Proteomic Identification of Novel Secreted Antibacterial Toxins of the  
616 *Serratia marcescens* Type VI Secretion System. *Mol Cell Proteomics* **12**, 2735-2749 (2013).
- 617 16. Trunk, K. *et al.* The type VI secretion system deploys antifungal effectors against microbial  
618 competitors. *Nature Microbiol* **3**, 920-931 (2018).
- 619 17. Iguchi, A. *et al.* Genome evolution and plasticity of *Serratia marcescens*, an important  
620 multidrug-resistant nosocomial pathogen. *Genome Biol Evol* **6**, 2096-2110 (2014).
- 621 18. Dalbey, R.E., Wang, P. & Kuhn, A. Assembly of bacterial inner membrane proteins. *Ann Rev*  
622 *Biochem* **80**, 161-187 (2011).
- 623 19. Jeeves, M. & Knowles, T.J. A novel pathway for outer membrane protein biogenesis in Gram-  
624 negative bacteria. *Mol Microbiol* **97**, 607-611 (2015).
- 625 20. te Winkel, J.D., Gray, D.A., Seistrup, K.H., Hamoen, L.W. & Strahl, H. Analysis of  
626 antimicrobial-triggered membrane depolarization using voltage sensitive dyes. *Front Cell Dev*  
627 *Biol* **4**, 29 (2016).
- 628 21. Daugelavičius, R., Bakiene, E. & Bamford, D.H. Stages of Polymyxin B Interaction with the  
629 *Escherichia coli* Cell Envelope. *Antimicrob Agents Chemother* **44**, 2969-2978 (2000).
- 630 22. Gregory, J.A., Becker, E.C. & Pogliano, K. *Bacillus subtilis* MinC destabilizes FtsZ-rings at  
631 new cell poles and contributes to the timing of cell division. *Genes Dev* **22**, 3475-3488 (2008).
- 632 23. Urfer, M. *et al.* A peptidomimetic antibiotic targets outer membrane proteins and disrupts  
633 selectively the outer membrane in *Escherichia coli*. *J Biol Chem* **291**, 1921-1932 (2016).
- 634 24. Helander, I. & Mattila-Sandholm, T. Fluorometric assessment of Gram-negative bacterial  
635 permeabilization. *J Appl Microbiol* **88**, 213-219 (2000).



- 636 25. Muheim, C. *et al.* Increasing the permeability of *Escherichia coli* using MAC13243. *Scientific*  
637 *Rep* **7**, 17629 (2017).
- 638 26. Miyata, S.T., Kitaoka, M., Brooks, T.M., McAuley, S.B. & Pukatzki, S. *Vibrio cholerae*  
639 requires the type VI secretion system virulence factor VasX to kill *Dictyostelium discoideum*.  
640 *Infect Immun* **79**, 2941-2949 (2011).
- 641 27. Yang, C.-C. & Konisky, J. Colicin V-treated *Escherichia coli* does not generate membrane  
642 potential. *J Bacteriol* **158**, 757-759 (1984).
- 643 28. Uratani, Y. & Hoshino, T. Pyocin R1 inhibits active transport in *Pseudomonas aeruginosa* and  
644 depolarizes membrane potential. *J Bacteriol* **157**, 632-636 (1984).
- 645 29. Mitchell, P. Chemiosmotic coupling in oxidative and photosynthetic phosphorylation.  
646 *Biological Reviews* **41**, 445-501 (1966).
- 647 30. Kashket, E.R. The proton motive force in bacteria: a critical assessment of methods. *Ann Rev*  
648 *Microbiol* **39**, 219-242 (1985).
- 649 31. Farha, M.A., Verschoor, C.P., Bowdish, D. & Brown, E.D. Collapsing the proton motive force  
650 to identify synergistic combinations against *Staphylococcus aureus*. *Chem Biol* **20**, 1168-1178  
651 (2013).
- 652 32. Epstein, W. The roles and regulation of potassium in bacteria. *Prog Nucleic Acid Res Mol Biol*  
653 **75**, 293-320 (2003).
- 654 33. Mulkidjanian, A.Y., Dibrov, P. & Galperin, M.Y. The past and present of sodium energetics:  
655 may the sodium-motive force be with you. *Biochim Biophys Acta* **1777**, 985-992 (2008).
- 656 34. Pugsley, A. Nucleotide sequencing of the structural gene for colicin N reveals homology  
657 between the catalytic, C-terminal domains of colicins A and N. *Mol Microbiol* **1**, 317-325  
658 (1987).
- 659 35. el Kouhen, R. *et al.* Characterization of the receptor and translocator domains of colicin N. *Eur*  
660 *J Biochem* **214**, 635-639 (1993).
- 661 36. Johnson, C.L., Ridley, H., Pengelly, R.J., Salleh, M.Z. & Lakey, J.H. The unstructured domain  
662 of colicin N kills *Escherichia coli*. *Mol Microbiol* **89**, 84-95 (2013).
- 663 37. Gould, J.M. & Cramer, W.A. Relationship between oxygen-induced proton efflux and  
664 membrane energization in cells of *Escherichia coli*. *J Biol Chem* **252**, 5875-5882 (1977).
- 665 38. Fields, K.L. & Luria, S.E. Effects of colicins E1 and K on cellular metabolism. *J Bact* **97**, 64-  
666 77 (1969).
- 667 39. Maloney, P.C., Kashket, E. & Wilson, T.H. A protonmotive force drives ATP synthesis in  
668 bacteria. *Proc Natl Acad Sci U S A* **71**, 3896-3900 (1974).
- 669 40. Braun, V. Energy-coupled transport and signal transduction through the gram-negative outer  
670 membrane via TonB-ExbB-ExbD-dependent receptor proteins. *FEMS Microbiol Rev* **16**, 295-  
671 307 (1995).
- 672 41. Natale, P., Brüser, T. & Driessen, A.J. Sec-and Tat-mediated protein secretion across the  
673 bacterial cytoplasmic membrane - distinct translocases and mechanisms. *Biochim Biophys Acta*  
674 **1778**, 1735-1756 (2008).
- 675 42. Dal Peraro, M. & Van Der Goot, F.G. Pore-forming toxins: ancient, but never really out of  
676 fashion. *Nature Rev Microbiol* **14**, 77-92 (2016).
- 677 43. Gouaux, E. Channel-forming toxins: tales of transformation. *Curr Opin Struct Biol* **7**, 566-573  
678 (1997).
- 679 44. Iacovache, I., Bischofberger, M. & van der Goot, F.G. Structure and assembly of pore-forming  
680 proteins. *Curr Opin Struct Biol* **20**, 241-246 (2010).
- 681 45. Degiacomi, M.T. *et al.* Molecular assembly of the aerolysin pore reveals a swirling membrane-  
682 insertion mechanism. *Nature Chem Biol* **9**, 623-629 (2013).
- 683 46. Yamashita, D. *et al.* Molecular basis of transmembrane beta-barrel formation of staphylococcal  
684 pore-forming toxins. *Nature Comm* **5**, 4897 (2014).
- 685 47. Mueller, M., Grauschopf, U., Maier, T., Glockshuber, R. & Ban, N. The structure of a cytolytic  
686  $\alpha$ -helical toxin pore reveals its assembly mechanism. *Nature* **459**, 726-730 (2009).
- 687 48. Dunkel, S., Pulagam, L., Steinhoff, H.-J. & Klare, J. In vivo EPR on spin labeled colicin A  
688 reveals an oligomeric assembly of the pore-forming domain in *E. coli* membranes. *Phys Chem*  
689 *Chem Phys* **17**, 4875-4878 (2015).

- 690 49. Espeset, D., Duche, D., Baty, D. & Geli, V. The channel domain of colicin A is inhibited by  
691 its immunity protein through direct interaction in the *Escherichia coli* inner membrane. *EMBO*  
692 *J* **15**, 2356 (1996).
- 693 50. Geli, V., Baty, D., Pattus, F. & Lazdunski, C. Topology and function of the integral membrane  
694 protein conferring immunity to colicin A. *Mol Microbiol* **3**, 679-687 (1989).
- 695 51. English, G. *et al.* New secreted toxins and immunity proteins encoded within the Type VI  
696 secretion system gene cluster of *Serratia marcescens*. *Mol Microbiol* **86**, 921-936 (2012).
- 697 52. Srikannathan, V. *et al.* Structural basis for Type VI secreted peptidoglycan DL-endopeptidase  
698 function, specificity and neutralization in *Serratia marcescens*. *Acta Crystallogr D* **69**, 2468-  
699 2482 (2013).
- 700 53. Murdoch, S.L. *et al.* The opportunistic pathogen *Serratia marcescens* utilizes type VI secretion  
701 to target bacterial competitors. *J Bacteriol* **193**, 6057-6069 (2011).
- 702 54. Donald, J.W., Hicks, M.G., Richardson, D.J. & Palmer, T. The c-type cytochrome OmcA  
703 localizes to the outer membrane upon heterologous expression in *Escherichia coli*. *J Bacteriol*  
704 **190**, 5127-5131 (2008).
- 705 55. Sambrook, J., Fritsch, E.F. & Maniatis, T. *Molecular Cloning: a Laboratory Manual*. (Cold  
706 spring harbor laboratory press, 1989).
- 707 56. Allan, C. *et al.* OMERO: flexible, model-driven data management for experimental biology.  
708 *Nature Methods* **9**, 245-253 (2012).
- 709 57. Woodier, J., Rainbow, R.D., Stewart, A.J. & Pitt, S.J. Intracellular zinc modulates cardiac  
710 ryanodine receptor-mediated calcium release. *J Biol Chem* **290**, 17599-17610 (2015).
- 711 58. Hodgkin, A.L. & Katz, B. The effect of sodium ions on the electrical activity of the giant axon  
712 of the squid. *J Physiol* **108**, 37-77 (1949).
- 713 59. Pitt, S.J., Lam, A.K., Rietdorf, K., Galione, A. & Sitsapesan, R. Reconstituted human TPC1 is  
714 a proton-permeable ion channel and is activated by NAADP or Ca<sup>2+</sup>. *Science Signaling* **7**, ra46-  
715 ra46 (2014).
- 716 60. Fatt, P. & Ginsborg, B. The ionic requirements for the production of action potentials in  
717 crustacean muscle fibres. *J Physiol* **142**, 516-543 (1958).
- 718 61. Pruitt, K.D., Tatusova, T. & Maglott, D.R. NCBI reference sequences (RefSeq): a curated non-  
719 redundant sequence database of genomes, transcripts and proteins. *Nucleic Acids Res* **35**, D61-  
720 D65 (2006).
- 721 62. Seemann, T. Prokka: rapid prokaryotic genome annotation. *Bioinformatics* **30**, 2068-2069  
722 (2014).
- 723 63. Eddy, S.R. Accelerated profile HMM searches. *PLoS Comp Biol* **7**, e1002195 (2011).
- 724 64. Edgar, R.C. MUSCLE: multiple sequence alignment with high accuracy and high throughput.  
725 *Nucleic Acids Res* **32**, 1792-1797 (2004).
- 726 65. Nguyen, L.-T., Schmidt, H.A., von Haeseler, A. & Minh, B.Q. IQ-TREE: a fast and effective  
727 stochastic algorithm for estimating maximum-likelihood phylogenies. *Mol Biol Evol* **32**, 268-  
728 274 (2014).
- 729 66. Yu, G., Smith, D.K., Zhu, H., Guan, Y. & Lam, T.T.Y. ggtree: an R package for visualization  
730 and annotation of phylogenetic trees with their covariates and other associated data. *Methods*  
731 *Ecol Evol* **8**, 28-36 (2017).
- 732 67. Wickham, H. *ggplot2: elegant graphics for data analysis*. (Springer, 2016).
- 733
- 734



735 **Acknowledgements**

736 This work was supported by the Wellcome Trust (104556/Z/14/Z, Senior Fellowship in Basic  
737 Biomedical Science to S.J.C.; 097818/Z/11/B and 109118/Z/15/Z, PhD studentships to University of  
738 Dundee), the MRC (MR/K000111X/1, New Investigator Research Grant to S.J.C.) and the Royal  
739 Society of Edinburgh (Biomedical Personal Research Fellowship to S.J.P.). We thank Roland Freudl  
740 for the gift of anti-OmpA antibody; Adam Ostrowski for construction of strains AO07 and AO08; Gal  
741 Horesh, Amy Dorward and Gavin Robertson for expert assistance; the Flow Cytometry and Cell Sorting  
742 Facility at the University of Dundee; and the Dundee Imaging Facility (supported by Wellcome Trust  
743 [097945/B/11/Z] and MRC [MR/K015869/1]) awards).

744

745 **Author Contributions**

746 G.M., K.T. and S.J.C. conceived the study; G.M., K.T., H.S., S.J.P. and S.J.C. designed experiments  
747 and analysed data; G.M., K.T. and L.M. performed experimental work; D.J.W. performed  
748 bioinformatics analyses; G.M. and S.J.C wrote the manuscript with input from all the other authors.

749

750 **Competing Financial Interests**

751 The authors declare no competing financial interests.

752

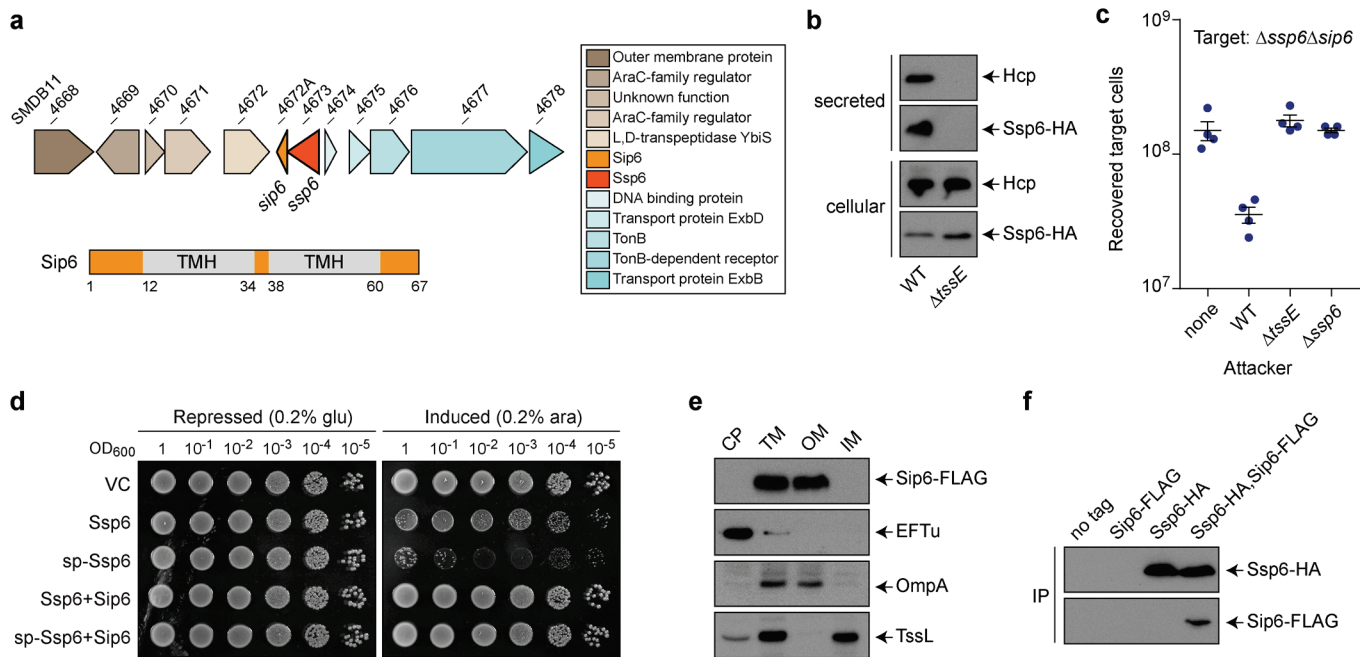

**Figure 1. Ssp6 is a T6SS-delivered toxin and Sip6 is its cognate, membrane-associated immunity protein.** (a) Schematic representation of the genomic context of the genes encoding Ssp6 and Sip6, with genomic identifiers (SMDB11\_xxxx) provided above each gene and predicted protein functions in the box to the right. Below, the positions of the two transmembrane helices in Sip6, predicted using TMHMM v. 2.0, are indicated, where numbers refer to amino acids. (b) Immunoblot detection of Hcp1 and Ssp6-HA in cellular and secreted fractions of *S. marcescens* Db10 carrying the chromosomally-encoded Ssp6-HA fusion in either an otherwise wild type (WT) or T6SS-inactive ( $\Delta tssE$ ) background. (c) Number of recovered  $\Delta ssp6\Delta sip6$  target cells following co-culture with wild type (WT),  $\Delta tssE$  or  $\Delta ssp6$  mutant strains of *S. marcescens* Db10 as attackers. Individual data points are overlaid with the mean  $\pm$  SEM (n=4 biological replicates); none, target cells incubated with sterile media alone. (d) Growth of *E. coli* MG1655 carrying empty vector control (VC, pBAD18-Kn) or plasmids directing the expression of native Ssp6 (Ssp6) or Ssp6 fused with an N-terminal OmpA signal peptide (sp-Ssp6), each with or without Sip6, on LBA containing 0.2% D-glucose or 0.2% L-arabinose to repress or induce, respectively, gene expression. (e) Cells of *S. marcescens* Db10 carrying chromosomally-encoded Sip6-FLAG were subjected to subcellular fractionation and analysed by immunoblot detection of the FLAG epitope, EFTu (cytoplasmic control protein), TssL (inner membrane control protein) and OmpA (outer membrane control protein). CP, cytoplasm; TM, total membrane; OM, outer membrane; IM, inner membrane. (f) Co-immunoprecipitation of Ssp6-HA and Sip6-FLAG. Total cellular protein samples from wild type *S. marcescens* Db10 (no tagged proteins) and strains carrying chromosomally-encoded Ssp6-HA, Sip6-FLAG, or Ssp6-HA and Sip6-FLAG, were subjected to anti-HA immunoprecipitation and the resulting eluates were analysed by immunoblot.

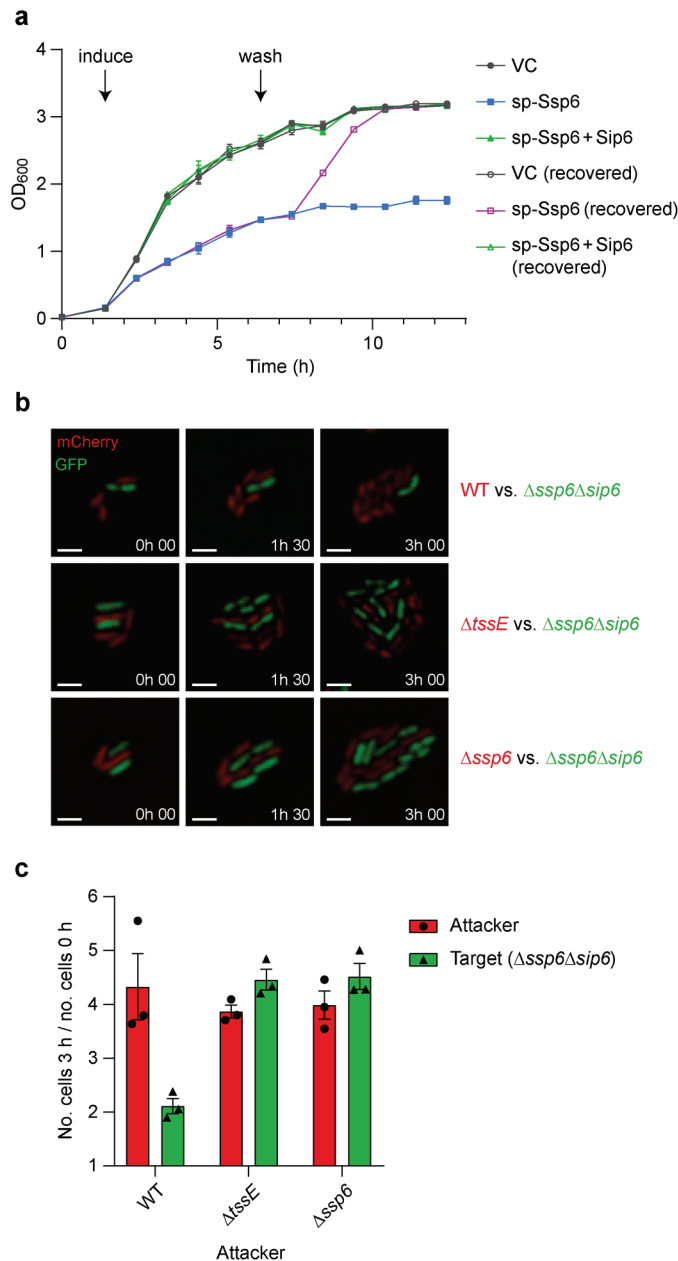

**Figure 2. Intoxication by Ssp6 causes cessation of bacterial growth.** (a) Growth in liquid LB media of *E. coli* MG1655 carrying empty vector control (VC, pBAD18-Kn) or plasmids directing the expression of Ssp6 fused with an N-terminal OmpA signal peptide (sp-Ssp6), either alone or with Sip6. To induce gene expression, 0.2% L-arabinose was added as indicated. To remove induction, the cells were washed and resuspended in fresh LB only ('recovered') at the 'wash' timepoint; control cells were resuspended in fresh LB + 0.2% L-arabinose. (b) Example images showing Ssp6-mediated growth inhibition as observed by time-lapse fluorescence microscopy. A Ssp6-susceptible target strain of *S. marcescens* Db10,  $\Delta ssp6\Delta sip6$  expressing cytoplasmic GFP (green), was co-cultured with wild type (WT) or mutant ( $\Delta ssp6$  or  $\Delta tssE$ ) attacker strains expressing cytoplasmic mCherry (red) for 3 h. Scale bar 2  $\mu$ m. (c) Quantification of time-lapse experiments. The total number of attacker cells and total

number of target cells in at least ten microcolonies per experiment was counted at  $t = 0$  h and 3 h and used to calculate fold increase in attacker and target cell numbers during the co-culture. Bars show mean  $\pm$  SEM, with individual data points superimposed ( $n=3$  independent experiments).

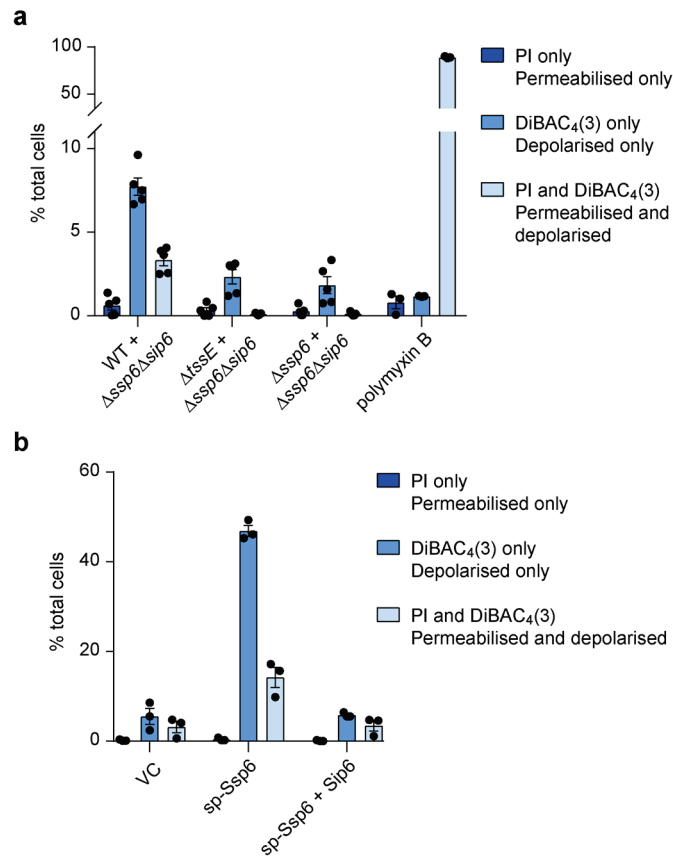

**Figure 3. Ssp6 intoxication via T6SS delivery or heterologous expression causes loss of membrane potential.** (a) The Ssp6-susceptible mutant of *S. marcescens* Db10,  $\Delta ssp6\Delta sip6$ , was co-cultured with the wild type (WT),  $\Delta tssE$  mutant or  $\Delta ssp6$  mutant and then membrane potential and membrane permeability of the mixed population was determined. Cells were stained with DiBAC<sub>4</sub>(3) and propidium iodide (PI) and analysed by flow cytometry, allowing different populations to be detected: depolarised (increased green fluorescence from DiBAC<sub>4</sub>(3)), permeabilised (red fluorescence from PI), depolarised and permeabilised cells (green fluorescence and red fluorescence), and healthy cells (below threshold fluorescence). The percentage of cells in the total mixed co-culture population identified as being permeabilised only, depolarised only, or simultaneously depolarised and permeabilised is shown on the Y-axis. Bars show mean  $\pm$  SEM, with individual data points superimposed (n=5 independent experiments, except for the polymyxin B control, where n=3). (b) Membrane potential and permeability of cells of *E. coli* MG1655 carrying empty vector control (VC, pBAD18-Kn) or plasmids directing the expression of Ssp6 fused with an N-terminal OmpA signal peptide (sp-Ssp6), either alone or with Sip6, was determined as in part a. Bars show mean  $\pm$  SEM, with individual data points superimposed (n = 3 independent experiments).

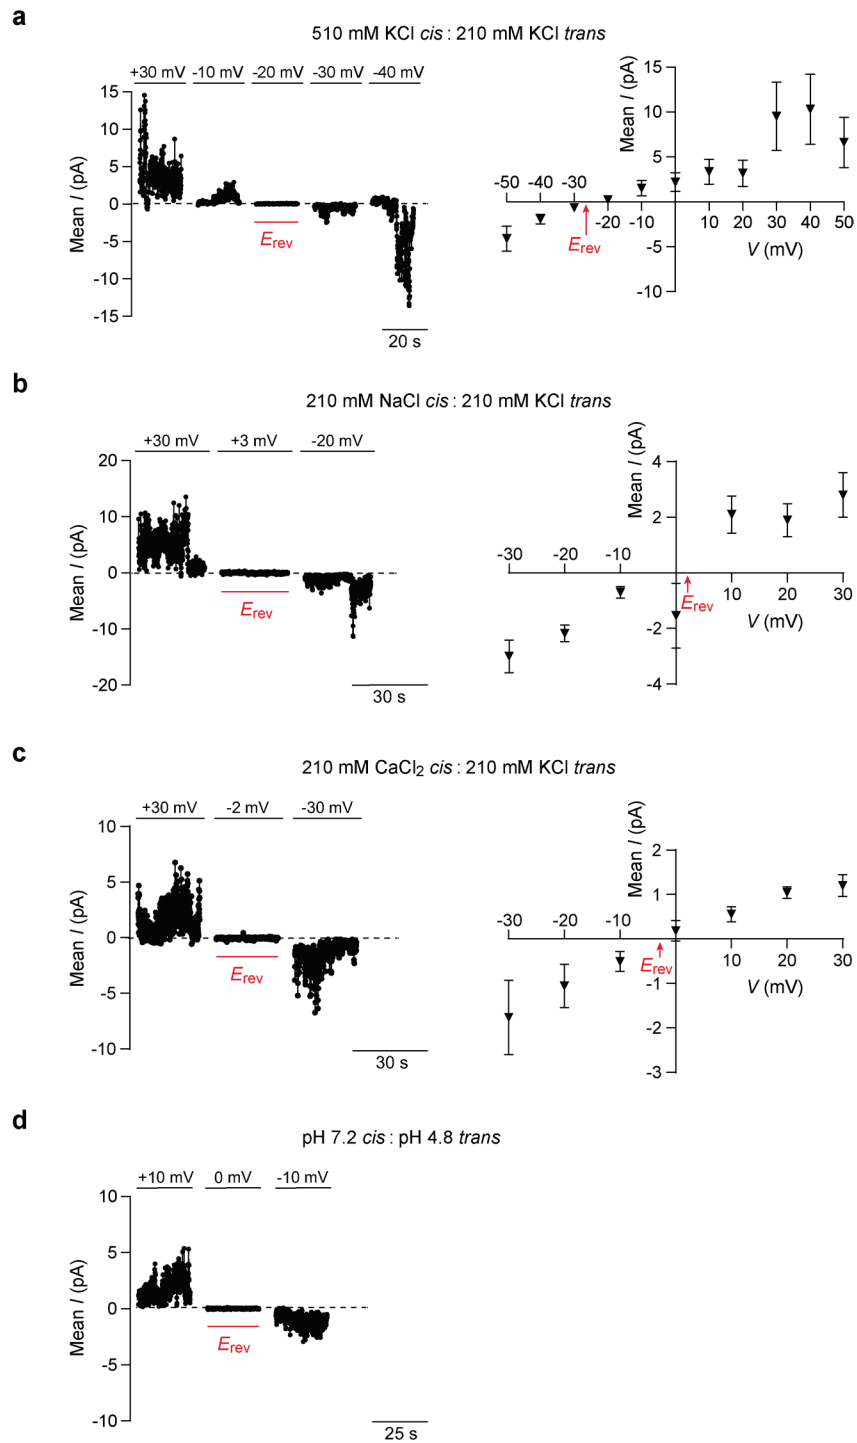

**Figure 4.** Ssp6 can form cation-selective pores *in vitro*. Multiple pores formed by MBP-Ssp6 were incorporated into the lipid bilayer under voltage clamp conditions and the mean current was measured. (a-c) Noise analysis of current fluctuations at the indicated holding potentials (left panels) and  $I/V$  relationship (right panels) for MBP-Ssp6 under conditions of: (a) a KCl gradient (510 mM *cis* chamber:210 mM *trans* chamber); (b) Na<sup>+</sup> in the *cis* chamber (210 mM NaCl) and K<sup>+</sup> in the *trans* chamber (210 mM KCl); and (c) Ca<sup>2+</sup> in the *cis* chamber (210 mM CaCl<sub>2</sub>) and K<sup>+</sup> in the *trans* chamber (210 mM KCl). (d) Noise analysis of current fluctuations at -10 mV, 0 mV and +10 mV under conditions

of symmetrical 210 mM K<sup>+</sup> acetate with the *cis* chamber at pH 7.2 and the *trans* chamber at pH 4.8. (a-d) The dotted line in each current trace shows the zero current level (left panels); points for  $I/V$  relationships (right panels) show mean  $\pm$  SEM (n=3 independent experiments, except part a where n=4); reversal potential ( $E_{rev}$ ) is indicated in red.



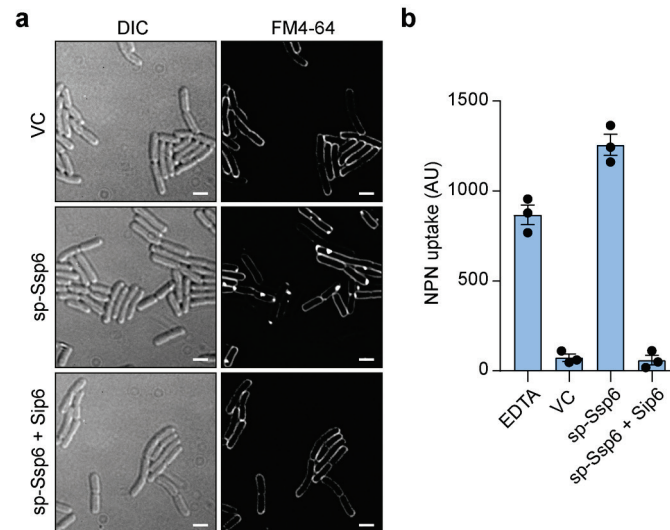

**Figure 5. Ssp6 intoxication affects the outer membrane.** (a) Visualisation of cells of *E. coli* MG1655 carrying empty vector control (VC, pBAD18-Kn) or plasmids directing the expression of Ssp6 fused with an N-terminal OmpA signal peptide (sp-Ssp6), either alone or with Sip6, using the membrane stain FM4-64 and fluorescence microscopy. FM4-64 staining was performed following growth in liquid LB containing 0.2% L-arabinose. Panels show DIC image (left) and FM4-64 channel (right). Scale bar 2  $\mu$ m. Images are representative of four independent experiments. (b) Measurement of NPN uptake by *E. coli* expressing sp-Ssp6 alone or with Sip6, as in part a. NPN accumulation is expressed as arbitrary fluorescence units (AU) and bars show mean  $\pm$  SEM, with individual data points superimposed (n = 3 independent experiments).

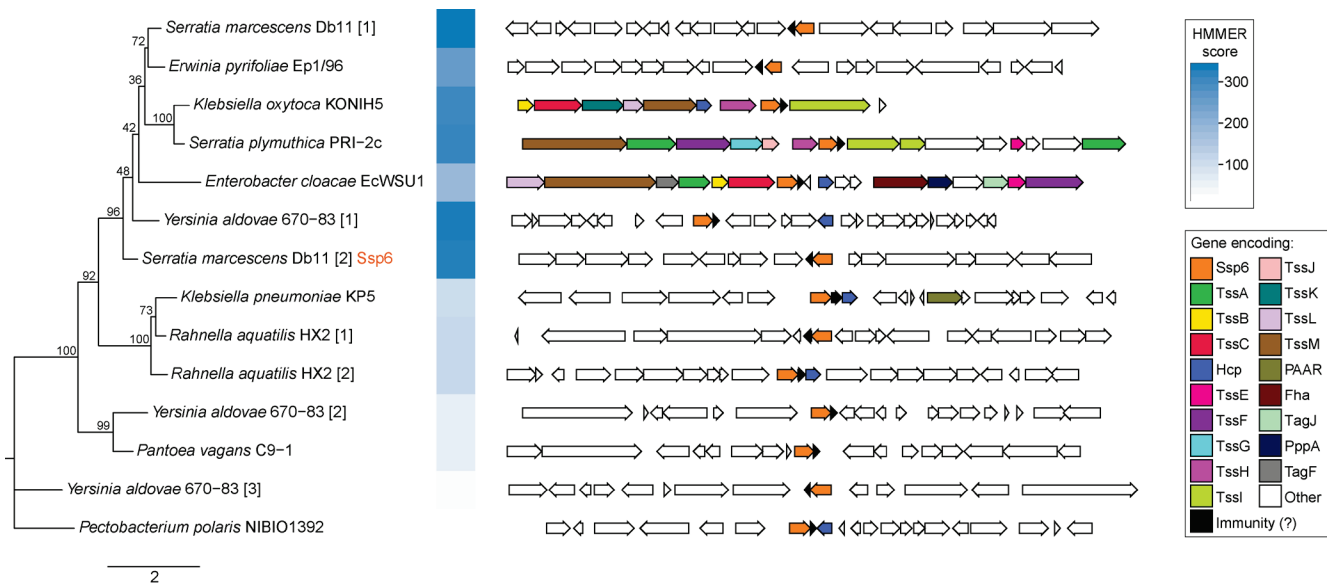

**Figure 6. Genes encoding Ssp6-like effectors are widespread in Enterobacteriaceae and can be linked with Type VI secretion system genes.** Phylogenetic tree of selected Ssp6 homologues identified using HMMER homology searching of complete bacterial genomic sequences (left) and the genetic context of the corresponding encoding gene (right). Where a particular organism encodes more than one Ssp6 homologue, each homologue is indicated by square brackets after the organism name. Bootstrap values are indicated on the tree and the scale indicates number of substitutions per site. In the genetic loci, conserved T6SS genes are coloured as per the legend; Ssp6 homologues are orange and genes encoding known or putative immunity proteins are black. The full set of identified homologues and details of the bacterial genome sequences can be found in Supplementary Figure 6 and Supplementary Table 3.
